# Supplementary material for: ICP-MS: a tool for detection and quantitation of fosfomycin residues in cleaning samples of finished product by estimation of phosphorous load
Source: Royal Society of Chemistry journal article supplement (doi:10.1039/d3ja00247k), 2023-11-03
Supplement: d3ja00247k1.pdf [file d3ja00247k1.pdf]

## SUPPLEMENTARY INFORMATION

### **ICP-MS: A tool for detection and quantitation of fosfomycin residues in cleaning samples of finished product by estimation of phosphorus load**

Anirban Roy Chowdhury, <sup>\*a</sup> Sujal Shah, <sup>a</sup> Rahul Y. Kapse, <sup>a</sup> Tushar Mehta<sup>a</sup> and Amit Mukharya<sup>a</sup>

<sup>a</sup>Amneal Pharmaceuticals Pvt Ltd., Pharmez, Ahmedabad, Gujarat-382213, India.

Email id: anirban.rc16@gmail.com

ORCID: <https://orcid.org/0009-0001-8667-5265>

### 1) Equation S1 : Accuracy/precision stock solution preparation

$$\text{Accuracy stock solution (43.624 } \mu\text{g/mL of phosphorus)} = \frac{37.06}{100} \times \frac{30.974}{259.19} \times \frac{98.50}{100} \times 1000$$

..... (1)

Where,

30.974 = Molecular weight of phosphorus

259.19 = Molecular weight of fosfomycin tromethamine salt

98.5 = Potency of fosfomycin tromethamine salt

### 2) Equation S2: Calculation for critical limit level concentration (CLLC) of phosphorus

$$\text{Limit of fosfomycin (}\mu\text{g/mL)} = \frac{\text{MACO value (5 } \mu\text{g/Inch}^2\text{)}}{\text{Swab sample volume (10 mL)}} \times \text{Swab surface area (4 Inch}^2\text{)}$$

..... (2a)

$$\text{Subsequent limit of P (ng/mL)} = \text{Fosfomycin limit (2 } \mu\text{g/mL)} \times \frac{30.974}{138.06} \times 1000$$

..... (2b)

$$\text{Residue of Fosfomycin (} \frac{\mu\text{g}}{\text{Inch}^2}\text{)} = \frac{(CT - CSB)}{1000} \times \frac{138.06}{30.974} \times \frac{10}{SA}$$

..... (2c)

Where,

CT = Concentration of phosphorus element in sample solution (ng/mL)

CSB = Concentration of phosphorus element in swab blank solution (ng/mL)

138.06 = Molecular weight of fosfomycin

30.974 = Molecular weight of phosphorus

10 = Swab sample volume (mL)

SA = Swab surface area (Inch<sup>2</sup>)

### 3) Linearity and Range:

**Table S1. Linearity data for concentration of phosphorus**

| Level | Linearity stock Solution (mL) | Internal standard solution (mL) | Volume made with diluent-2 (mL) | Concentration of phosphorus (ng/mL) |
|-------|-------------------------------|---------------------------------|---------------------------------|-------------------------------------|
| 10%   | 0.1                           | 1                               | 50                              | 44.92                               |
| 25%   | 0.25                          | 1                               | 50                              | 112.3                               |
| 50%   | 0.5                           | 1                               | 50                              | 224.6                               |
| 100%  | 1.0                           | 1                               | 50                              | 449.2                               |
| 150%  | 1.5                           | 1                               | 50                              | 673.8                               |
| 200%  | 2.0                           | 1                               | 50                              | 898.4                               |

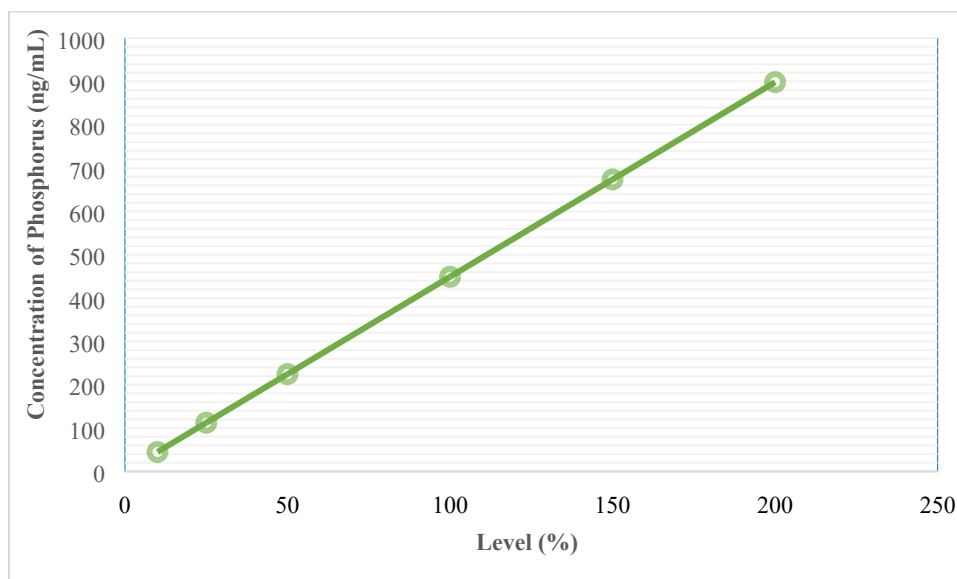

**Figure S1. Linearity graph for developed method**

#### 4) Equation S3: Calculation of % drift and % bias

$$\% \text{ Bias} = \text{ABS} \left| \frac{[\text{Standard conc. of standard solution (150\% in ng/mL)} - [\text{Obtained conc. of standard solution (150\%) of drift check in ng/mL}]]}{[\text{Standard conc. of standard solution (150\% in ng/mL)}]} \right| \times 100$$

..... (3a)

$$\% \text{ Drift} = \text{ABS} \left| \frac{[\text{Standard solution (150\%) before sample solution aspiration (ng/mL)}] - [\text{Standard solution (150\%) after sample solution aspiration (ng/mL)}]}{[\text{Standard solution (150\%) before sample solution aspiration (ng/mL)}]} \right| \times 100$$

..... (3b)

Where, ABS represents to absolute

**5) Table S2: Results of swab sample analysis of Fosfomycin**

| <b>Sr. No.</b> | <b>Swab Sample Name</b>  | <b>Result (µg/Inch<sup>2</sup> of Fosfomycin)</b> |
|----------------|--------------------------|---------------------------------------------------|
| 1              | Equipment-1@, Location-A | Below LOD*                                        |
| 2              | Equipment-1@, Location-B | Below LOD*                                        |
| 3              | Equipment-1@, Location-C | Below LOD*                                        |
| 4              | Equipment-2@, Location-A | Below LOD*                                        |
| 5              | Equipment-2@, Location-B | Below LOD*                                        |
| 6              | Equipment-2@, Location-C | Below LOD*                                        |
| 7              | Equipment-2@, Location-D | Below LOD*                                        |
| 8              | Equipment-3@, Location-A | Below LOD*                                        |
| 9              | Equipment-3@, Location-B | Below LOD*                                        |
| 10             | Equipment-3@, Location-C | Below LOD*                                        |
| 11             | Equipment-3@, Location-D | Below LOD*                                        |

\*LOD (Limit of detection) value: 0.25 µg/Inch<sup>2</sup>

@Actual equipment Id has been coded.
